# Supplementary material for: Novel co-culture plate enables growth dynamic-based assessment of contact-independent microbial interactions
Source: PubMed Central journal article supplement (PMC5540398; doi:10.1371/journal.pone.0182163), 2017-08-02
Supplement: pone.0182163.s002.pdf [file pone.0182163.s002.pdf]

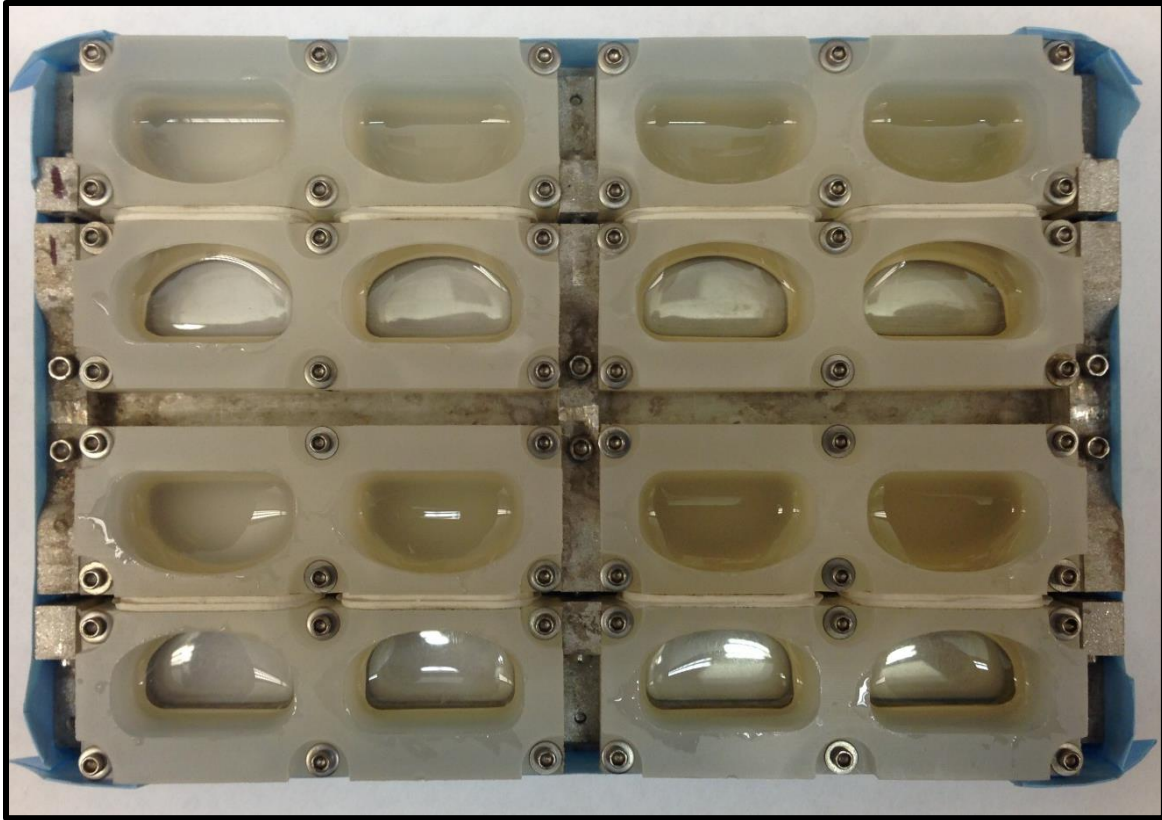

**Fig S1. Endpoint image of co-culture plate after representative experiment from Fig 2.** Note that the lower wells are all devoid of bacterial growth, while the well on the other side of the membrane is inoculated with an active culture of *E. coli*. Sterility of the wells is maintained by the membranes.
