# Supplementary material for: Novel co-culture plate enables growth dynamic-based assessment of contact-independent microbial interactions
Source: PubMed Central journal article supplement (PMC5540398; doi:10.1371/journal.pone.0182163), 2017-08-02
Supplement: pone.0182163.s004.pdf [file pone.0182163.s004.pdf]

2

1

B

B

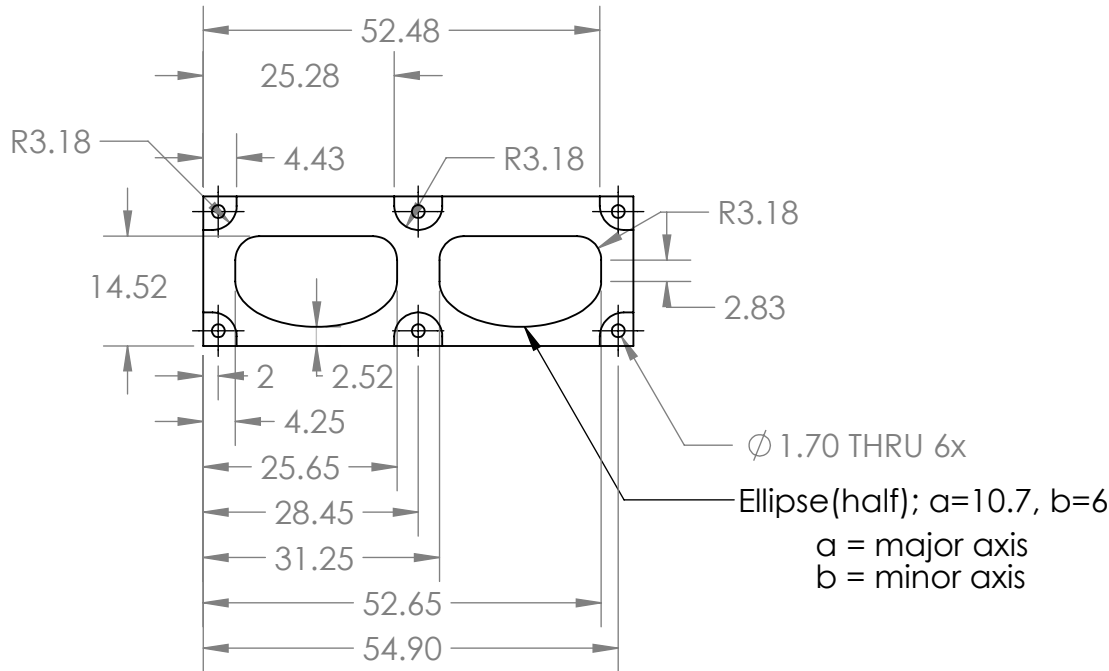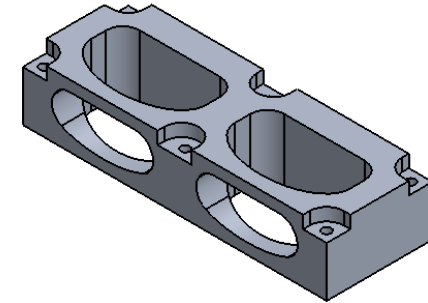

A

A

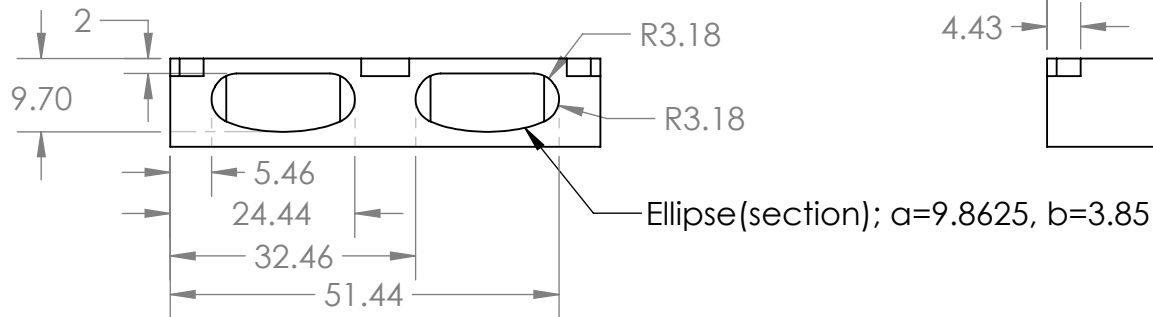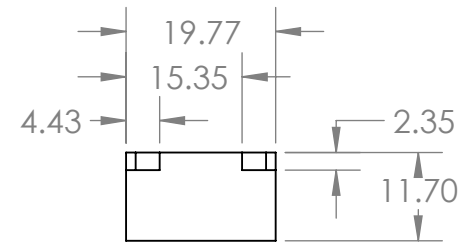

**SOLIDWORKS Student Edition.**  
**For Academic Use Only.**

**SingleChamber**  
 DIMENSIONS ARE IN MM  
 Material: Polypropylene  
 Scale 1:1

2

1

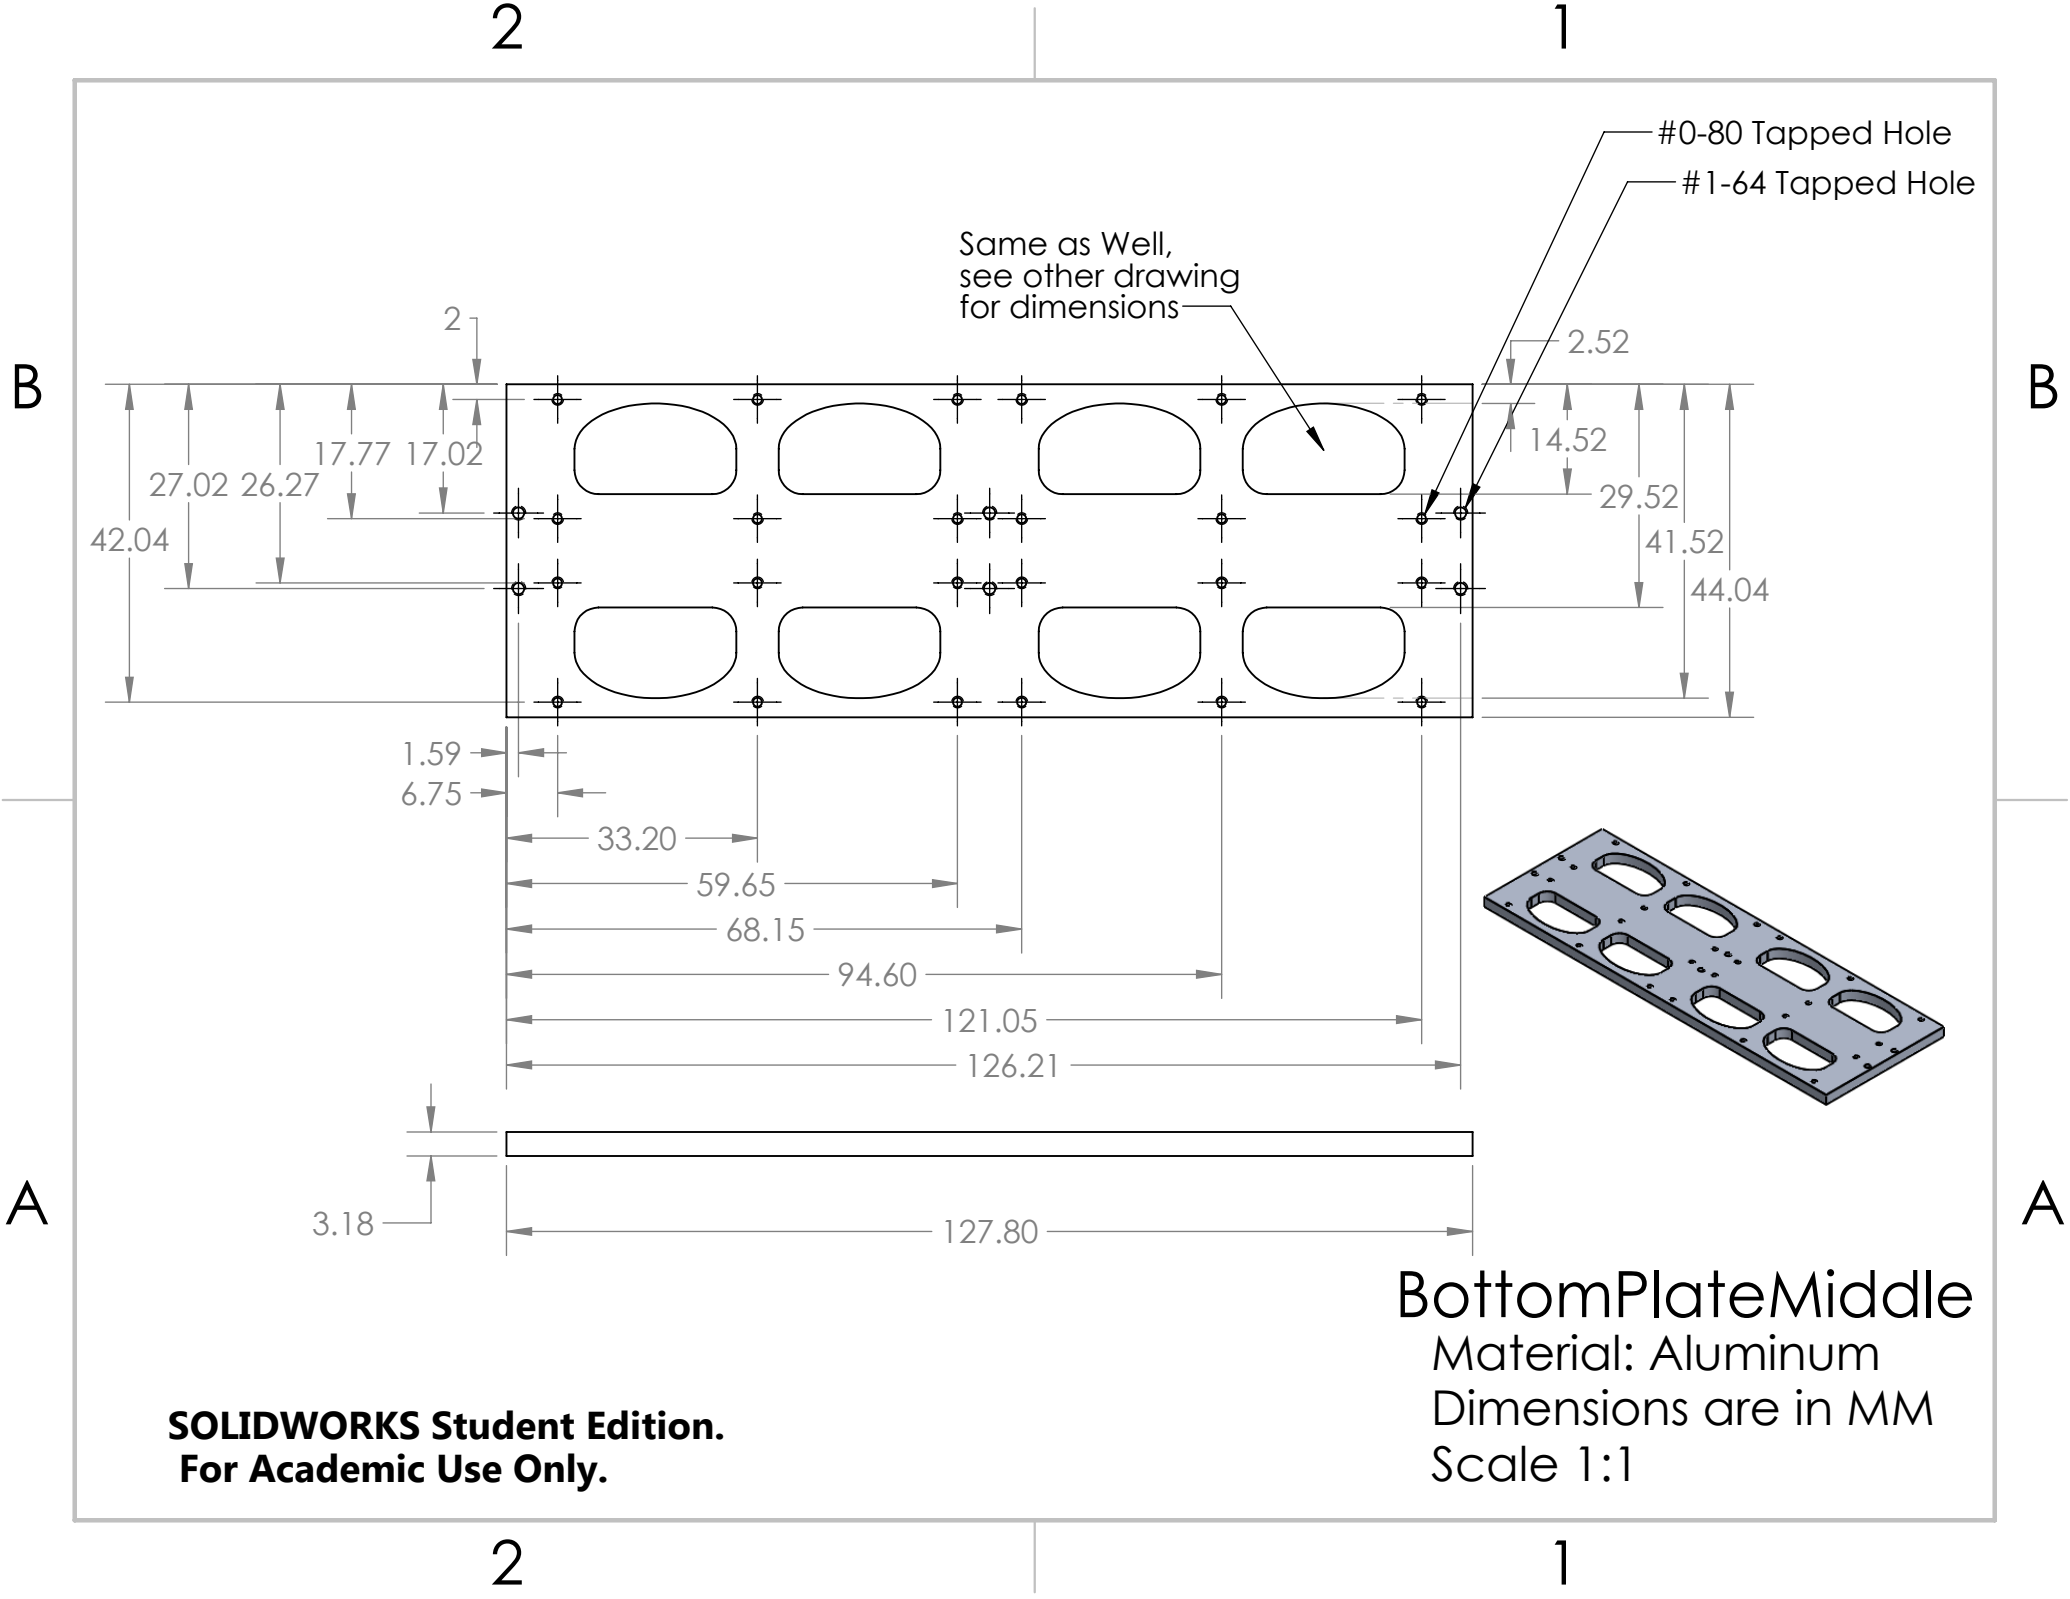

2

1

B

B

A

A

Same as Well,  
see other drawing  
for dimensions

#0-80 Tapped Hole  
#1-64 Tapped Hole

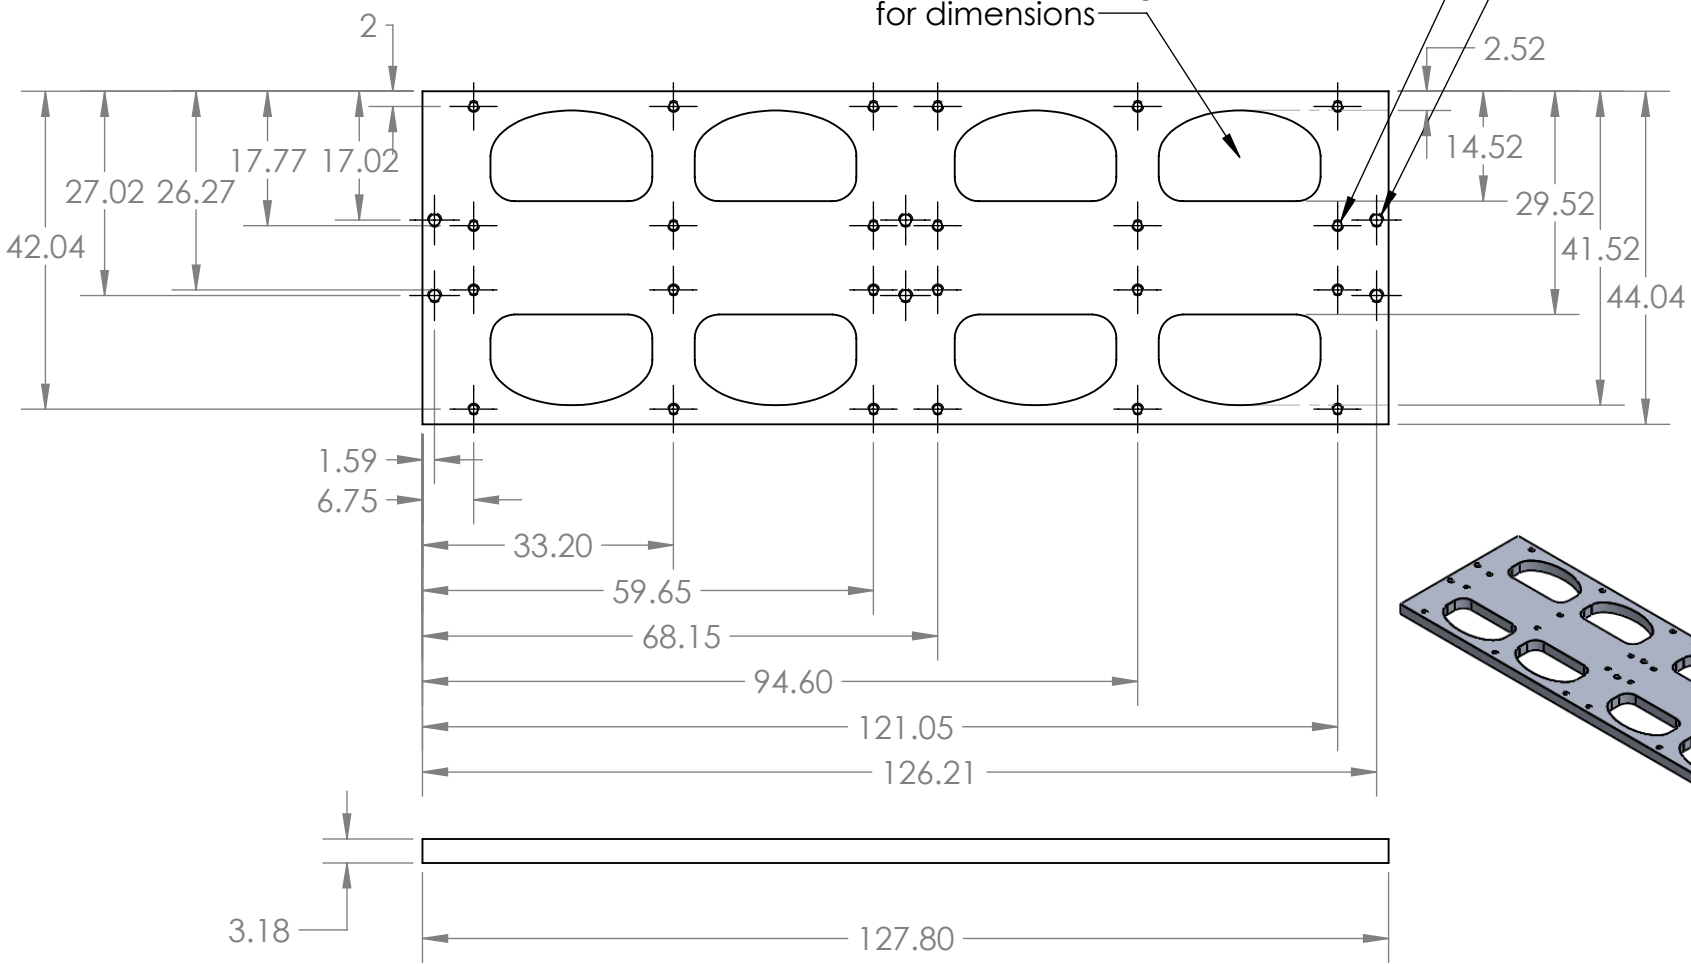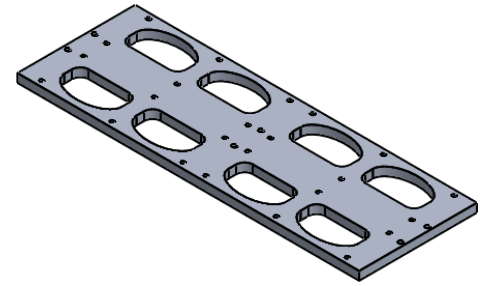

BottomPlateMiddle  
Material: Aluminum  
Dimensions are in MM  
Scale 1:1

**SOLIDWORKS Student Edition.**  
**For Academic Use Only.**

2

1

B

B

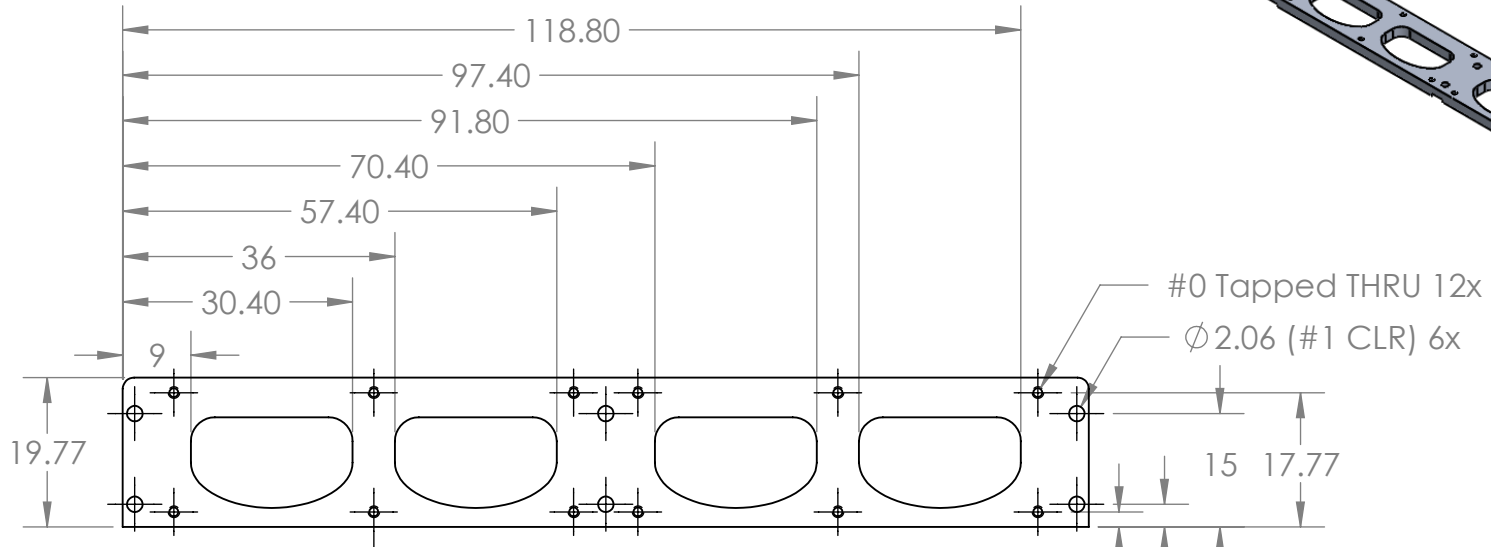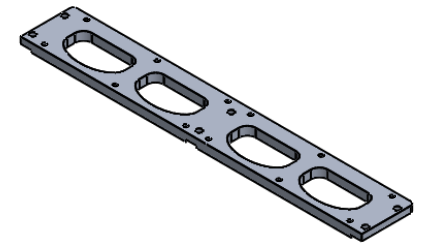

A

A

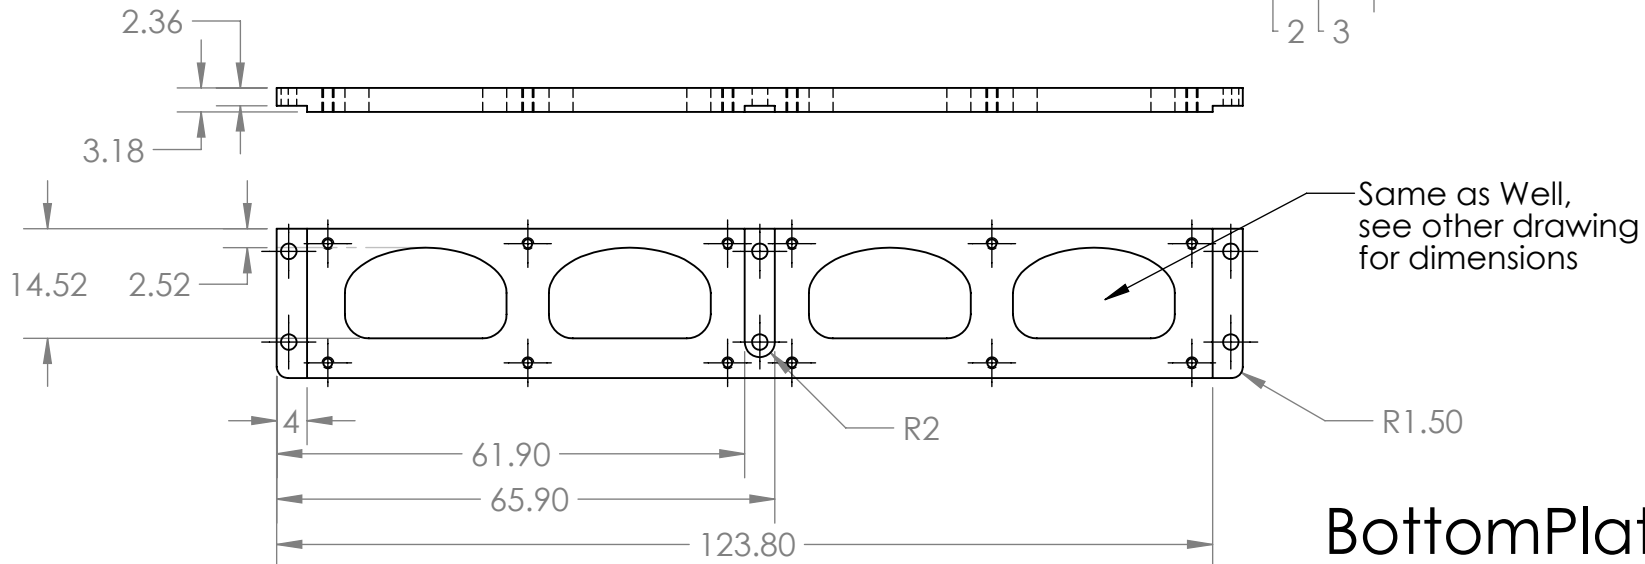

### BottomPlateSide

Material: Aluminum  
 Dimensions are in MM  
 Scale 1:1

**SOLIDWORKS Student Edition.**  
**For Academic Use Only.**

2

1

2

1

B

B

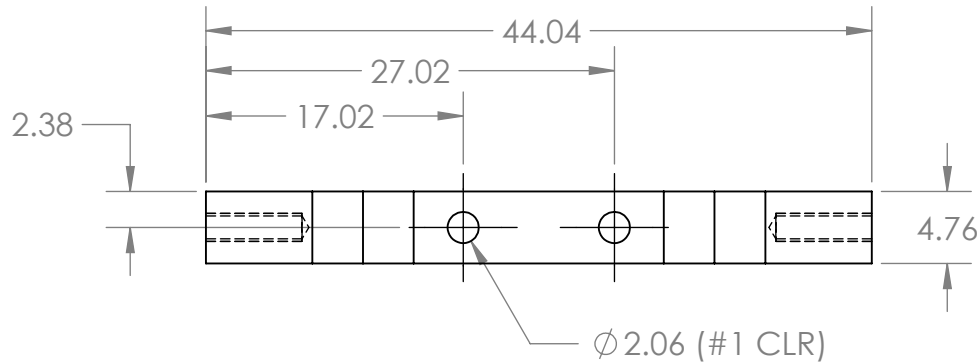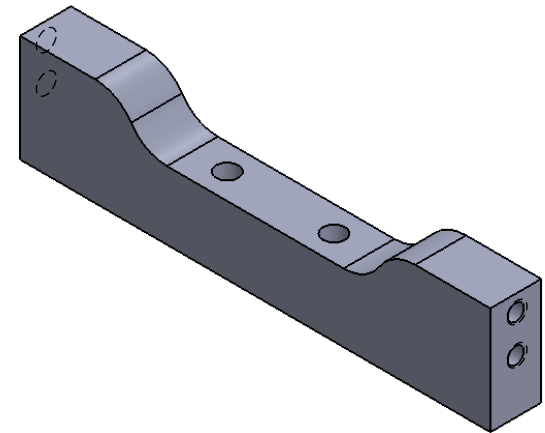

#1-64 Tapped Hole

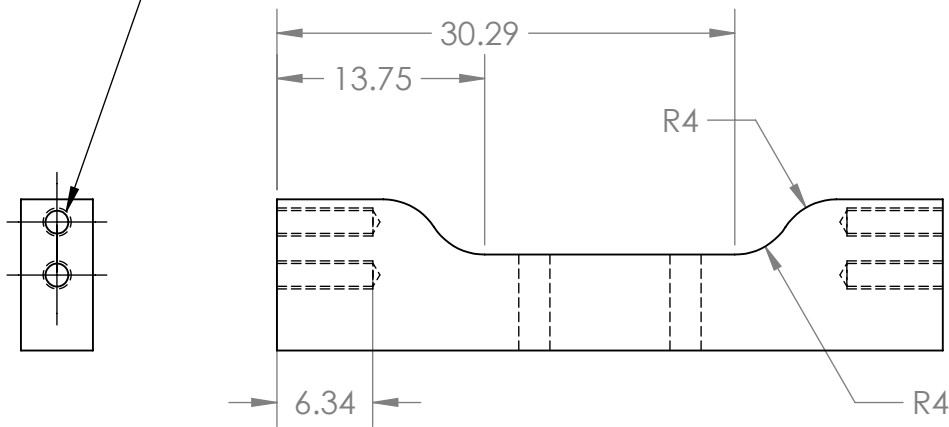

#1-64 Tapped Hole

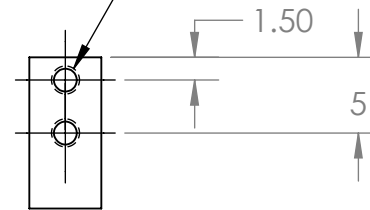

A

A

MiddlePlateSide

Material: Aluminum

Dimensions are in MM

Scale 2:1

**SOLIDWORKS Student Edition.**  
**For Academic Use Only.**

2

1

2

1

B

B

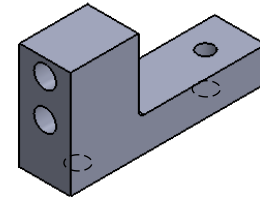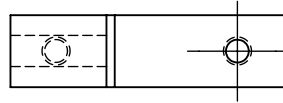

Ø 2.06 THRU  
#1 CLR 2x

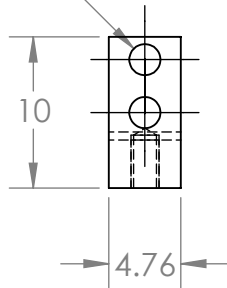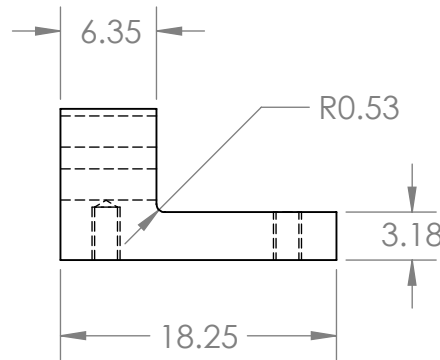

# 1-64 Tapped Hole  
▽ 3.50

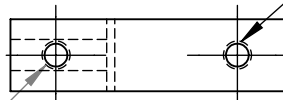

# 1-64 Tapped Hole THRU

A

SidePlateSide

Dimensions are in MM

Material: Aluminum

Scale 2:1

**SOLIDWORKS Student Edition.**  
**For Academic Use Only.**

2

1

A

B

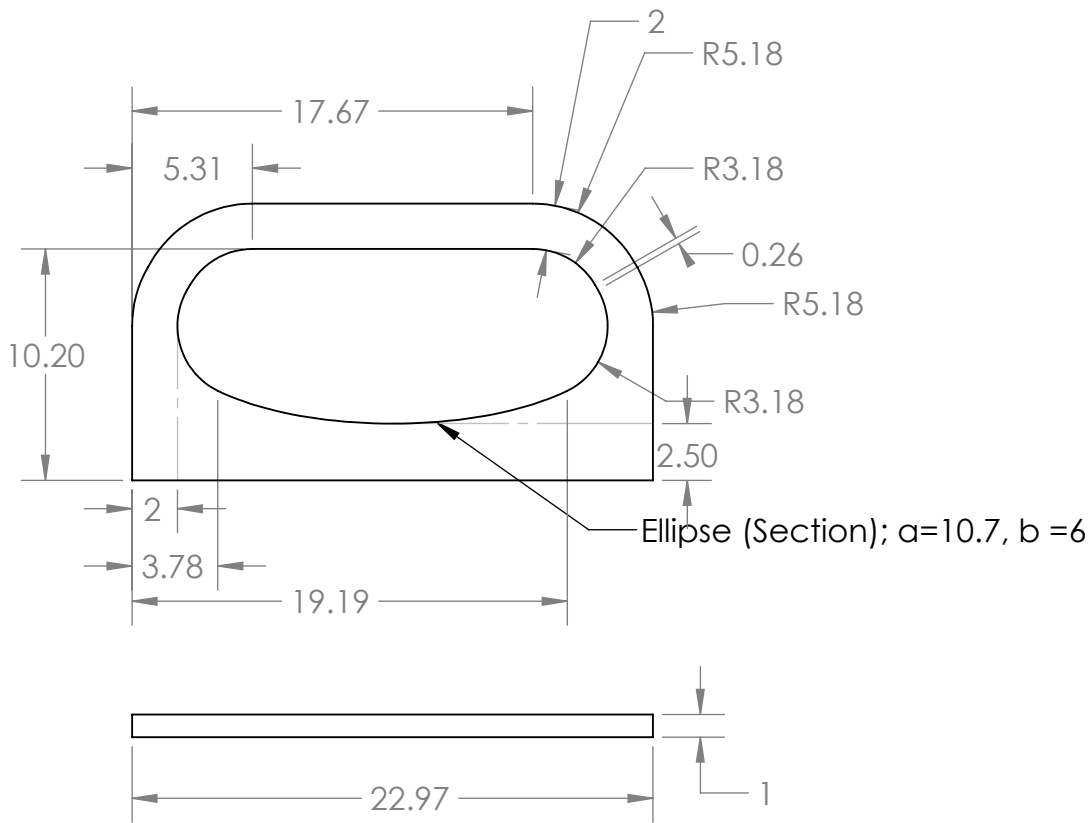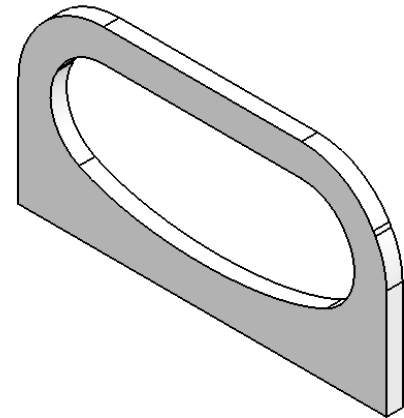

B

A

## Larger\_membrane\_gasket

Material: Silicone

Dimensions are in MM

Scale 3:1

**SOLIDWORKS Student Edition.**  
**For Academic Use Only.**

A

2

1

2

1

B

B

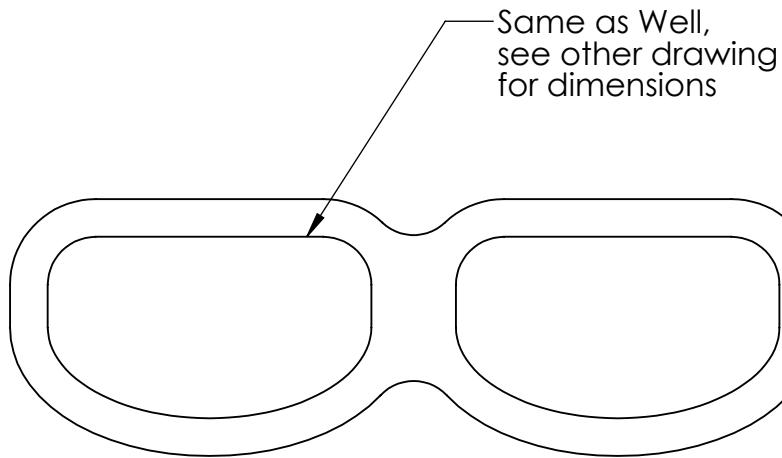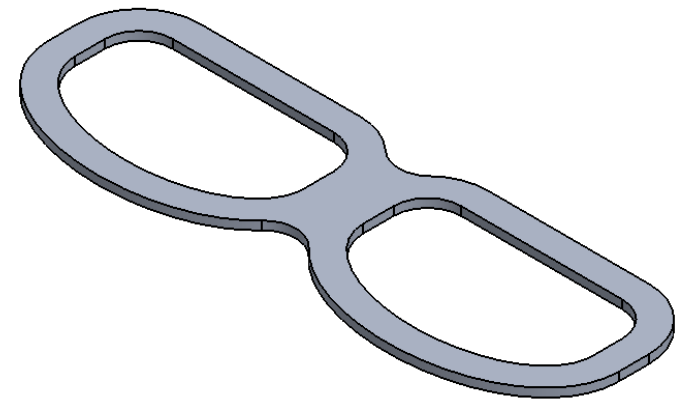

Same as Polycarbonate bottom,  
see other drawing  
for dimensions

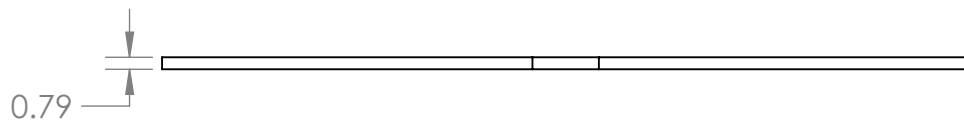

A

A

**SOLIDWORKS Student Edition.**  
**For Academic Use Only.**

**BottomGasket**  
Material: silicone  
Dimensions are in MM  
Scale 2:1

2

1

2

1

B

B

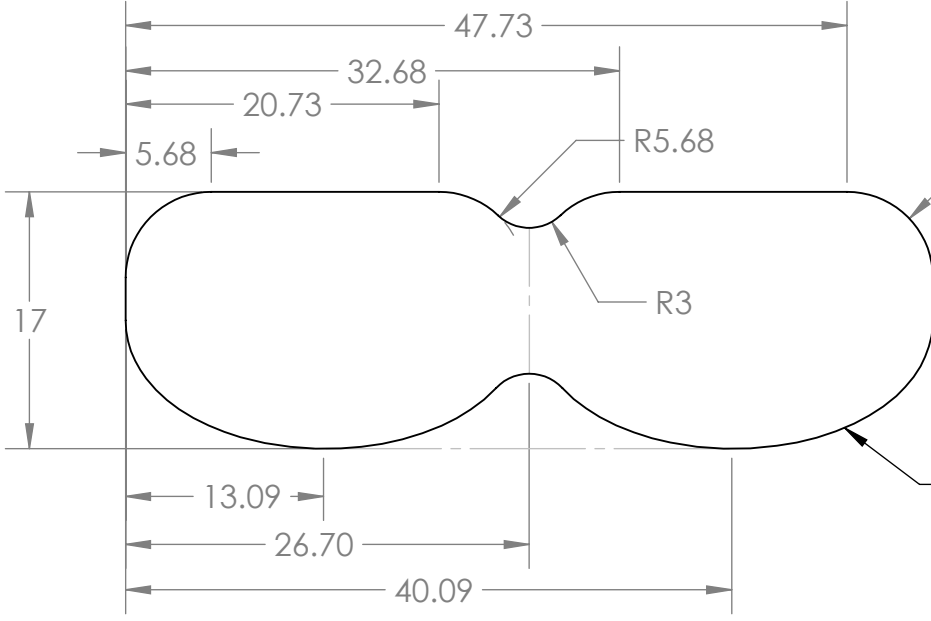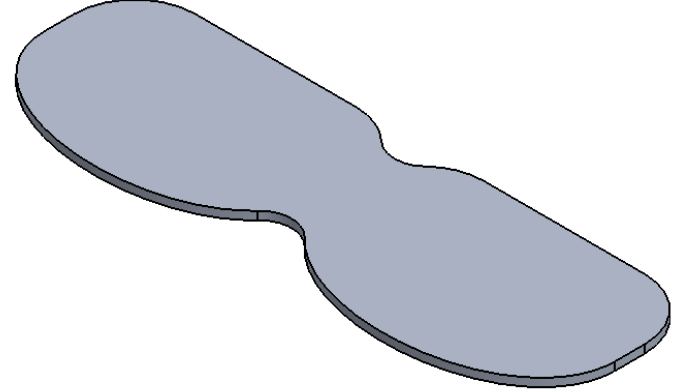

Ellipse (Section): a = 12.7, b = 8

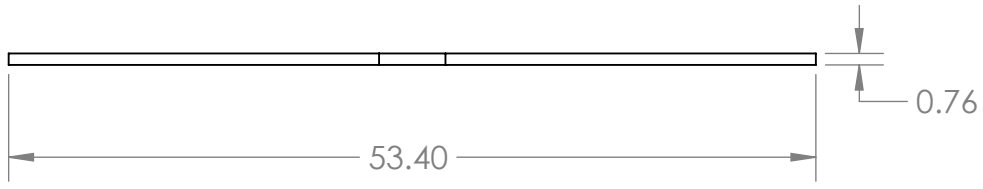

A

A

BottomPolyCarb  
 Material: Polycarbonate  
 Dimensions are in MM  
 Scale 2:1

**SOLIDWORKS Student Edition.**  
**For Academic Use Only.**

2

1
